# Supplementary material for: Invigorating the catalytic performance of CoP through interfacial engineering by Ni2P precipitation
Source: Royal Society of Chemistry journal article supplement (doi:10.1039/c9ta10498d), 2019-01-01
Supplement: c9ta10498d1.pdf [file c9ta10498d1.pdf]

## Electronic Supplementary Information

### Invigorating the Catalytic Performance of CoP through Interfacial Engineering by Ni<sub>2</sub>P Precipitation

*Junyu Zhang,<sup>a</sup> Sufeng Wei,<sup>b</sup> Yan Liu,<sup>c</sup> Guoyong Wang,<sup>\*,a</sup> Yuhuan Cui,<sup>a</sup> Anqi Dong,<sup>a</sup> Shan Xu,<sup>a</sup> Jianshe Lian,<sup>a</sup>*

*Qing Jiang<sup>a</sup>*

<sup>a</sup> Key Laboratory of Automobile Materials, Department of Materials Science and Engineering, Jilin University, Changchun, 130025, PR China. E-mail: materwanggy@jlu.edu.cn

<sup>b</sup> Key Laboratory of Advanced Structural Materials, Changchun University of Technology, Changchun, 130012, PR China

<sup>c</sup> Key Laboratory of Bionic Engineering (Ministry of Education) and State Key Laboratory of Automotive Simulation and Control, Jilin University, Changchun 130022, PR China

**KEYWORDS:** Catalytic properties, Gibbs free energy, Metal phosphides, Interfacial energy, Surface engineering

- 
- \*Corresponding author.
  - †Electronic supplementary information (ESI) available.

## Experimental details

**Preparation of CoP/Ni<sub>2</sub>P catalyst.** Firstly, 0.75 mmol of Co(Ac)<sub>2</sub>·4H<sub>2</sub>O (99 wt%, Tianjin Guangfu Fine Chemical Research Institute) and 0.75 mmol of Ni(Ac)<sub>2</sub>·4H<sub>2</sub>O (99 wt%, Tianjin Guangfu Fine Chemical Research Institute) were dissolved into 10 ml of 1,3-propanediol (99 wt%, Aladdin) and sonicated at least 30 minutes. Then, 40 ml of isopropanol (99.8 wt%, BeiJing Chemical Works, 99.8%) was added into the solution. After sonication for 10 minutes, the final solution was transferred to a Teflon-lined stainless steel autoclave and heated to 160 °C for 12 h. Then cooled down to room temperature. The precursors were collected, washed with ethanol for several times and dried in a vacuum oven at 70 °C for 12 h. Finally, the precursors (0.1 g in a porcelain boat) and NaH<sub>2</sub>PO<sub>2</sub> (1.0 g in another porcelain boat) were placed at two separate positions of the tube furnace. The samples were heated at 350 °C for 2 h with a ramping rate of 3 °C min<sup>-1</sup> in Ar atmosphere, then naturally cooled down to room temperature. The obtained products were thoroughly washed with deionized water to remove any residual salts and then dried in a vacuum oven at 60 °C.

**Structural Characterization.** Crystal structures of the as-synthesized catalysts were examined by an X-Ray diffraction (XRD) using a Cu K $\alpha$  radiation source (Rigaku, D/max 2500PC). Scanning electron microscopy (SEM) images were obtained with a field emission scanning electron microscopy (FESEM; JSM-6700F). The Energy dispersive X-ray spectroscopy (EDS) was obtained by Oxford Instruments X-MAX. Transmission electron microscope (TEM) and high-resolution transmission electron microscope (HRTEM) images were obtained using JEM-2100F with an accelerating voltage of 200 kV. X-ray photoelectron spectroscopy (XPS) experiments were performed on an ESCALab MK II electron spectrometer (Vacuum Generators) with unmonochromatic 240 W Al K $\alpha$  X-rays. The propotion of Ni and Co in electrolyte before and after long-term durability test was measured by inductively coupled plasma-atomic emission spectrometry (ICP-OES, ThermoScientific iCAP6300).

**Preparation of Working Electrode and Electrochemical Test.** 3 mg sample was dispersed in 550  $\mu$ L of water/ethanol/ 5 wt% Nafion (V / V / V = 250: 250: 50) and sonicated for at least 20 min. Then 4  $\mu$ L of the

catalyst ink was pipetted onto a glassy carbon electrode (GCE,  $\Phi = 3$  mm) with a loading of 0.31 mg/cm<sup>2</sup>.

All electrochemical measurements of various catalysts were performed on an electrochemical workstation (CHI 750E) with a three-electrode setup. A glassy carbon electrode coated, a graphite rod and saturated calomel electrode (SCE) were used as working, counter and reference electrode at 0.5 M H<sub>2</sub>SO<sub>4</sub> and 1 M PBS electrolyte, and for 1 M KOH electrolyte, the Hg|HgO electrode was used as reference electrode. The electrolyte was bubbled with O<sub>2</sub> and H<sub>2</sub> for 20 min prior to OER and HER measurements. Linear scanning voltammetry (LSV) was carried out at a scan rate of 5 mV s<sup>-1</sup> in various pH electrolyte at room temperature, and the time-dependent current density curves were recorded under respective overpotential. The electrochemical impedance spectroscopy (EIS) measurements were carried out from 10 kHz to 0.01 Hz with an overpotential of 100 mV. All LSV polarization curves have been iR-corrected. The measured potentials vs. SCE reference electrode were converted to the RHE according to the Nernst equation:

$$E_{(\text{RHE})} = E_{(\text{SCE})} + 0.0591 \times \text{pH} + 0.241 \text{ (V)}$$

where  $E_{(\text{SCE})}$  is the applied potential vs. SCE and 0.241 V is the standard potential of the SCE reference electrode at 25 °C, and for Hg|HgO electrode, the standard potential is replaced by 0.098 V.

The overall water splitting was performed in a two-electrode system, one CoP/Ni<sub>2</sub>P electrode served as the negative electrode for HER and another CoP/Ni<sub>2</sub>P electrode acted as the positive electrode for OER. The catalytic durability of the two-electrode full cell system for overall water splitting was tested in 1.0 M KOH electrolyte at an applied potential to reach an initial catalytic current density of 10 mA cm<sup>-2</sup>.

In this work, we use electrochemical double layer capacitance ( $C_{\text{dl}}$ ) to characterize the electrochemical active surface area (ECSA). The  $C_{\text{dl}}$  was measured by cyclic voltammograms in a potential region of 0.1 V to 0.3 V vs RHE with different scan rate of 20 to 140 mV/s. The  $C_{\text{dl}}$  is estimated by plotting the  $\Delta j$  at 0.2 V vs. RHE against the scan rates, where the slope is twice  $C_{\text{dl}}$ . The ECSA of 1 cm<sup>2</sup> is represented by a special capacitance value of 0.2 mF/cm<sup>2</sup>. ECSA and ECSA current density ( $j_{\text{ECSA}}$ ) were calculated by the following equation:

$$\text{ECSA} = C_{\text{dl}} (\text{mF cm}^{-2}) / 0.2 (\text{mF cm}^{-2})$$

$$j_{\text{ECSA}} = I (\text{mA}) / \text{ECSA} (\text{cm}^2)$$

Cyclic voltammetry measurements of our samples were carried out in PBS electrolyte (PH=7) with a potential window from  $-0.2$  to  $0.6$  V vs RHE and a scan rate of  $50$  mV/s. Assuming one electron redox process, the integrated charge over the whole potential range was divided by two. Then, the value was divided by the Faraday constant to get the number of active sites for different samples. The turnover frequency ( $\text{s}^{-1}$ ) can be estimated according to this equation:

$$\text{TOF} = jS / 2nF$$

where  $j$  is the current density measured,  $S$  is the surface area of the electrode,  $F$  is the Faraday constant ( $96485.30$  C/mol),  $n$  is the number of the active sites (mol) for different samples, and number 2 is 2 electrons per mole of hydrogen.

## Figures:

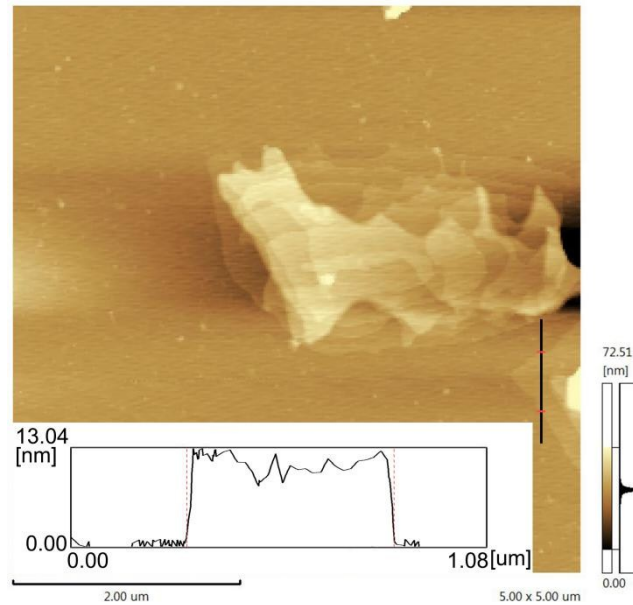

**Fig. S1** AFM images of CNOH-2 and corresponding depth analysis.

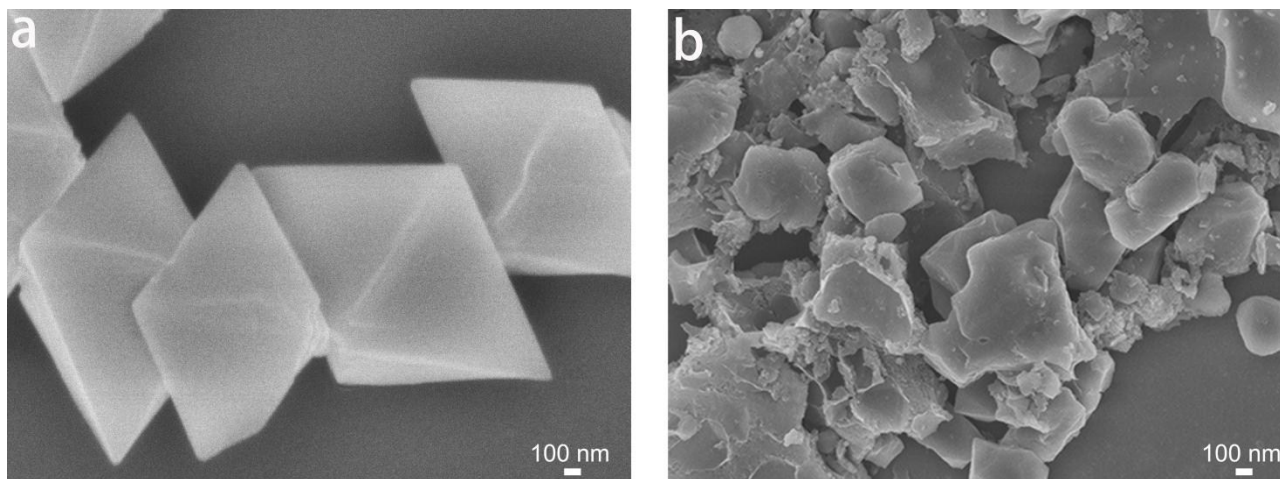

**Fig. S2** FESEM images of pure  $\text{Ni}(\text{OH})_2$  and pure  $\text{Ni}_2\text{P}$ .

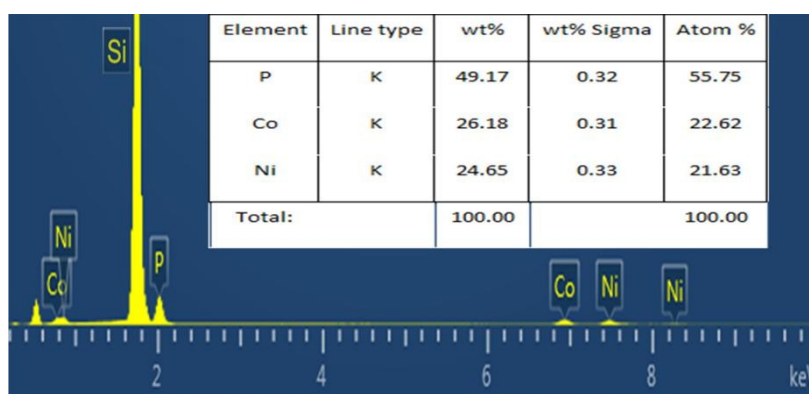

**Fig. S3** The energy dispersive X-ray spectrum for the CNP-2 ( $\text{Ni} : \text{Co} = 1 : 1$ ) hybrids.

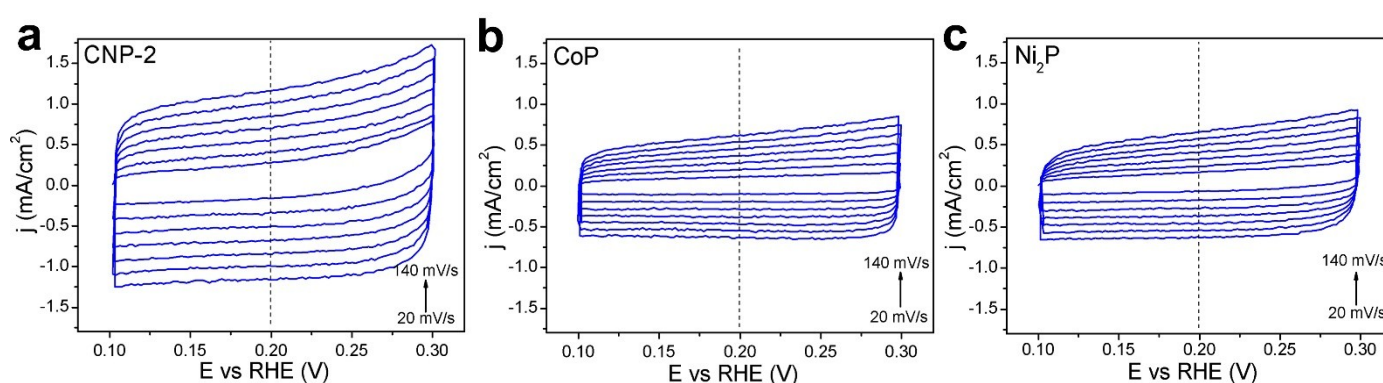

**Fig. S4** CV curves of (a)  $\text{Ni}_2\text{P}$ , (b)  $\text{CoP}$  and (c)  $\text{CNP-2}$  with various scan rates (20, 40, 60, 80, 100, 120 and  $140 \text{ mV s}^{-1}$ ). The capacitive current from double layer charging can be measured from CV data in a potential range where no faradaic processes observed.

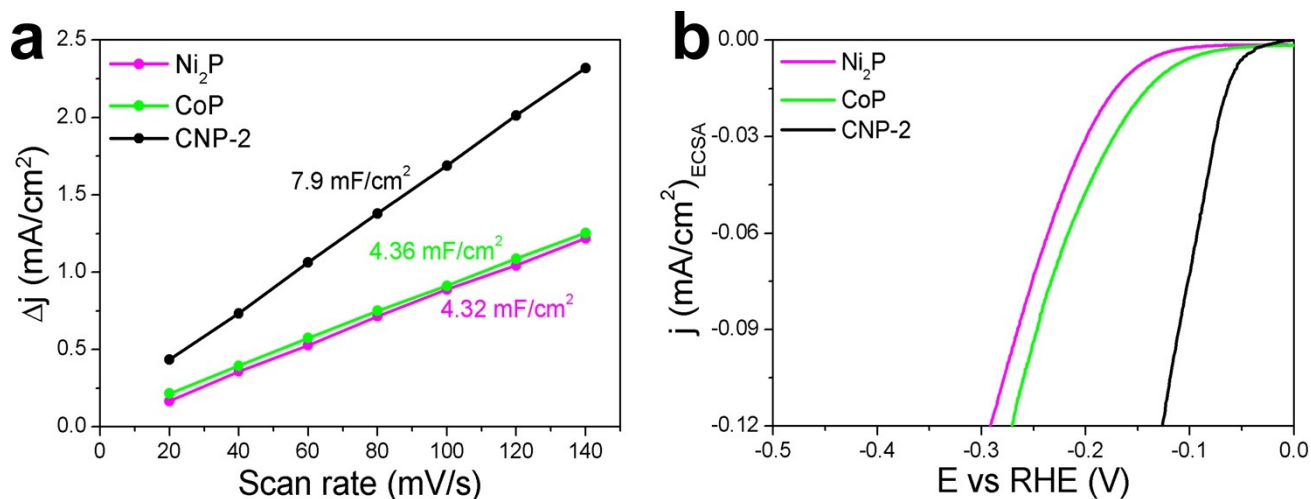

**Fig.S5** (a) The  $C_{dl}$  for  $\text{Ni}_2\text{P}$ ,  $\text{CoP}$  and  $\text{CNP-2}$  at 0.2 V. (b) LSVs of  $\text{Ni}_2\text{P}$ ,  $\text{CoP}$  and  $\text{CNP-2}$  normalized to the electrochemically active surface area (ECSA).

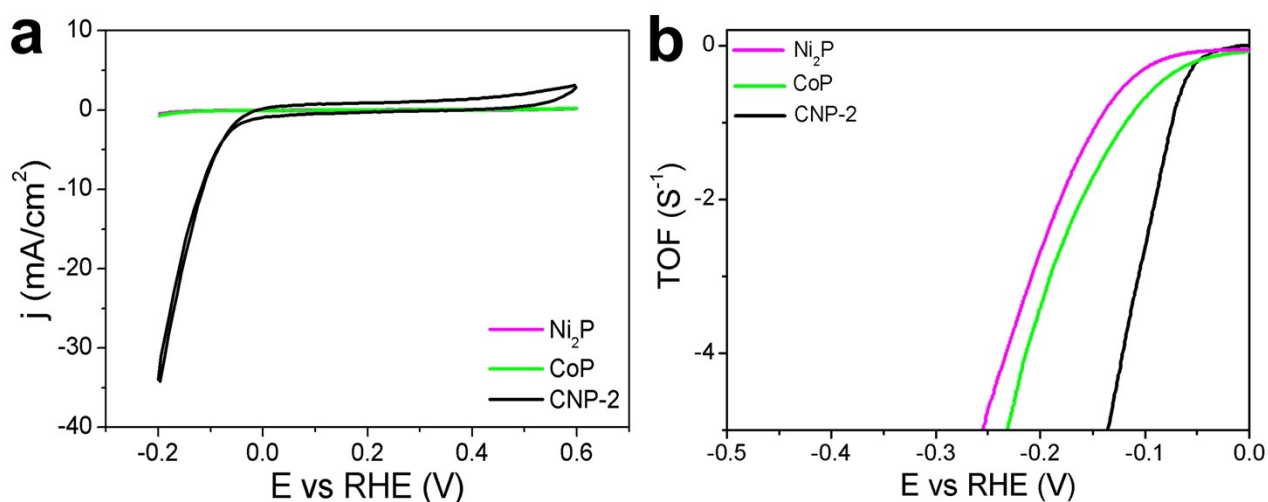

**Fig.S6** (a) The cyclic voltammeters for  $\text{CNP-2}$ ,  $\text{CoP}$  and  $\text{Ni}_2\text{P}$  catalysts in 1.0 M PBS (pH=7) at a scan rate of 50  $\text{mV}/\text{s}$ . (b) The corresponding TOF curves for the catalysts in the range of the applied potentials.

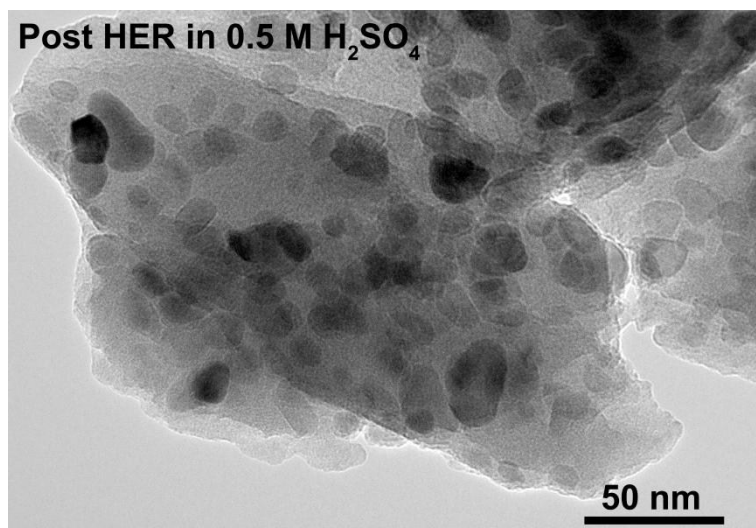

**Fig. S7** TEM image of the CNP-2 catalyst after 20 h HER durability testing in 0.5 M  $\text{H}_2\text{SO}_4$ .

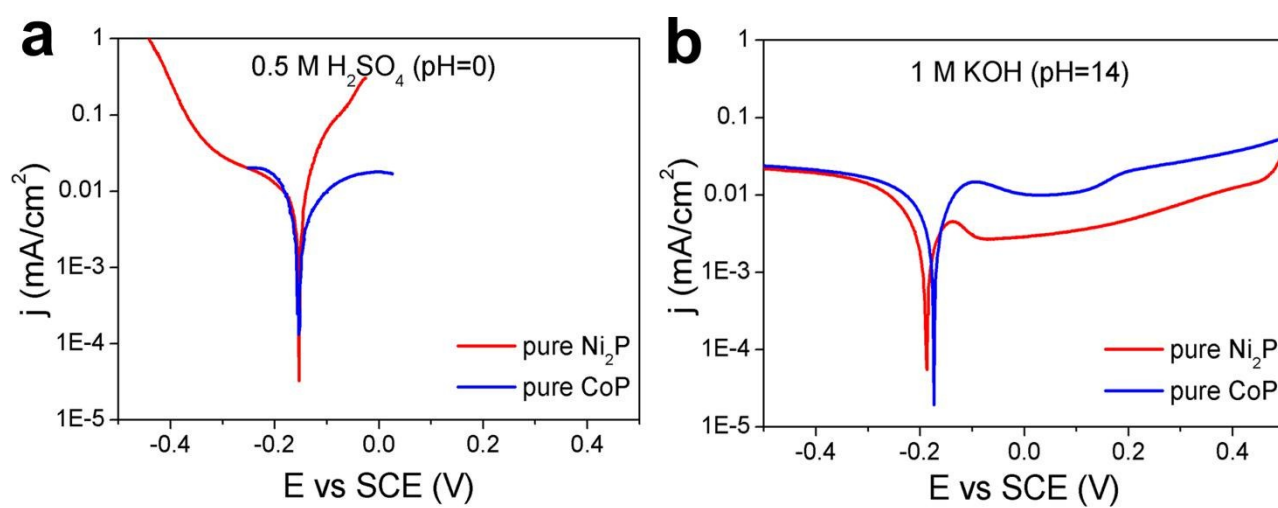

**Fig. S8** Potentiodynamic curves of pure  $\text{Ni}_2\text{P}$  and pure CoP at pH=0 and pH=14 environment.



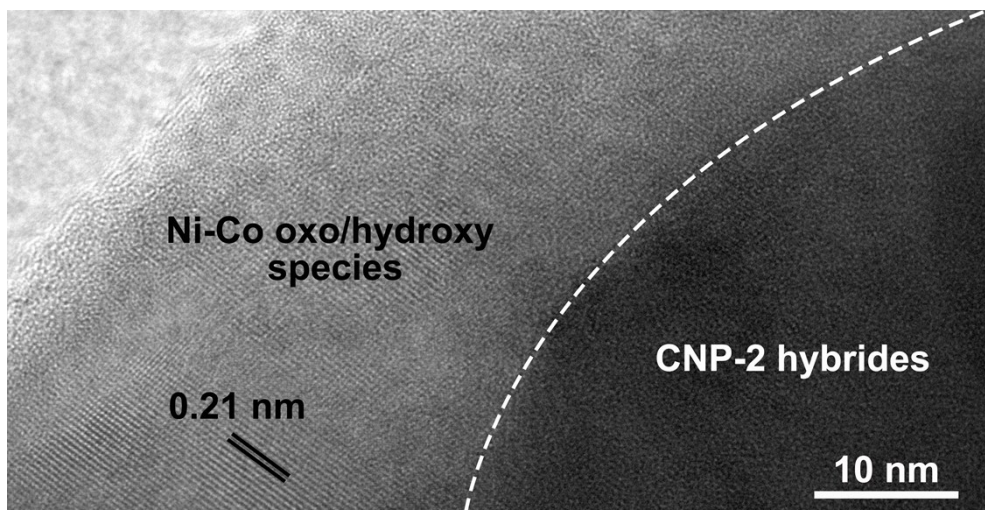

**Fig. S9** HRTEM image of the CNP-2 catalyst after OER process in 1.0 M KOH electrolyte.

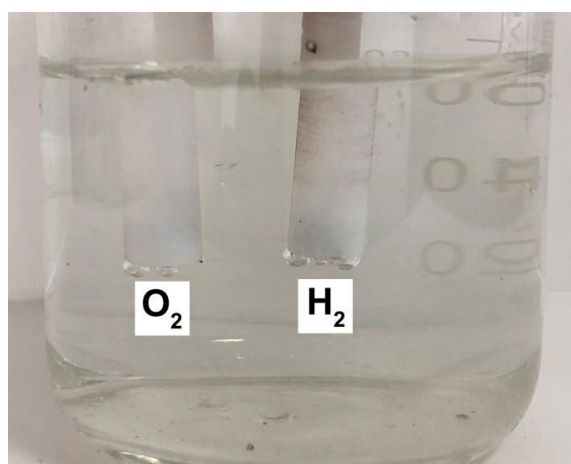

**Fig. S10** The photo of the overall water splitting cell.

**Table S1** The concentration of Co and Ni before and after potentiostatic test in 0.5 M H<sub>2</sub>SO<sub>4</sub>.

| Element | Original electrolyte (ug/mL) | After test (ug/mL) |
|---------|------------------------------|--------------------|
| Co      | 0                            | 0.0742             |
| Ni      | 0                            | 0.0695             |



**Table S2** Comparison of HER performance in 0.5 M H<sub>2</sub>SO<sub>4</sub> for CNP-2 with other HER catalysts.

| Catalyst                                             | Overpotential<br>(mV, j=10 mA/cm <sup>2</sup> ) | Tafel slope<br>(mV/dec) | Reference        |
|------------------------------------------------------|-------------------------------------------------|-------------------------|------------------|
| <b>CNP-2</b>                                         | <b>55</b>                                       | <b>54</b>               | <b>This work</b> |
| Ni <sub>2</sub> P/CNT                                | 124                                             | 53                      | 1                |
| Ni <sub>12</sub> P <sub>5</sub> spheres              | 144                                             | 46                      | 2                |
| Ni <sub>5</sub> P <sub>4</sub> -Ni <sub>2</sub> P-NS | 130                                             | 79                      | 3                |
| Ni <sub>5</sub> P <sub>4</sub> NC                    | 175                                             | 42                      | 4                |
| CoP NP                                               | 85                                              | 50                      | 5                |
| CoP NW                                               | 100                                             | 51                      | 6                |
| CoP-CNTs                                             | 139                                             | 52                      | 7                |
| CoP NTs                                              | 129                                             | 60                      | 8                |
| CoP CPHs                                             | 133                                             | 51                      | 9                |
| C@Ni-Co-P                                            | 110                                             | 48                      | 10               |
| Co-Fe-P 3D electrode                                 | 80                                              | 45                      | 11               |
| CoNi/NC                                              | 142                                             | 105                     | 12               |

**Table S3** Comparison of HER performance in 1.0 M PBS buffer for CNP-2 hybrids with other HER catalysts.

| Catalyst                           | Overpotential<br>(mV, j=10 mA/cm <sup>2</sup> ) | Tafel slope<br>(mV/dec) | Reference        |
|------------------------------------|-------------------------------------------------|-------------------------|------------------|
| <b>CNP-2</b>                       | <b>133</b>                                      | <b>94</b>               | <b>This work</b> |
| NiP <sub>2</sub> /CC               | 136                                             | 103                     | 13               |
| CoP-400                            | 161                                             | 81                      | 14               |
| CoP/PCNF                           | 191                                             | 111                     | 15               |
| Porus Ni <sub>2</sub> P polyhedron | 160                                             | 78                      | 16               |
| Ni <sub>2</sub> P/Ni               | 190                                             | 142                     | 17               |
| NiP <sub>x</sub> -coated CC        | 230                                             | 101                     | 18               |
| Co-NRCNTs                          | 540                                             | -                       | 19               |
| CoP NA/CC                          | 145                                             | 123                     | 20               |

**Table S4** Comparison of HER performance in 1.0 M KOH for CNP-2 hybrids with other non-precious HER catalysts.

| Catalyst                  | Overpotential<br>(mV, $j=10 \text{ mA/cm}^2$ ) | Tafel slope<br>(mV/dec) | Reference        |
|---------------------------|------------------------------------------------|-------------------------|------------------|
| <b>CNP-2</b>              | <b>200</b>                                     | <b>112</b>              | <b>This work</b> |
| <b>CoP NW</b>             | 209                                            | 129                     | 6                |
| <b>CoP/CC</b>             | 209                                            | 129                     | 6                |
| <b>Co-NRCNTs</b>          | 370                                            | -                       | 19               |
| <b>Ni<sub>2</sub>P</b>    | 220                                            | -                       | 21               |
| <b>NiCoP/rGO</b>          | 270                                            | 124                     | 22               |
| <b>Co@N-C</b>             | 210                                            | 108                     | 23               |
| <b>Ni/NiS</b>             | 230                                            | 115                     | 24               |
| <b>CoO<sub>x</sub>@CN</b> | 232                                            | 82                      | 25               |

**Table S5** Comparison of OER performance in 1.0 M KOH for CNP-2 hybrids with other representative catalysts

| Catalyst                   | Overpotential<br>(mV, $j=10 \text{ mA/cm}^2$ ) | Tafel slope<br>(mV/dec) | Reference        |
|----------------------------|------------------------------------------------|-------------------------|------------------|
| <b>CNP-2</b>               | <b>300</b>                                     | <b>62</b>               | <b>This work</b> |
| <b>Co-P film</b>           | 345                                            | 47                      | 26               |
| <b>NiCoP microspheres</b>  | 340                                            | 86                      | 27               |
| <b>NiCoP NPs</b>           | 310                                            | 52                      | 27               |
| <b>CoP/rGO hybrids</b>     | 340                                            | 66                      | 28               |
| <b>Ni-P</b>                | 300                                            | 64                      | 29               |
| <b>Fe-Ni oxide</b>         | 375                                            | -                       | 30               |
| <b>NiFe-NS</b>             | 302                                            | 67                      | 31               |
| <b>Ni-Co binary oxides</b> | 325                                            | 45                      | 32               |
| <b>NiCo LDH</b>            | 367                                            | 66                      | 33               |

**Table S6** The concentration of Co and Ni before and after EWS test in 1.0 M KOH.

| Element | Original electrolyte (ug/mL) | After test (ug/mL) |
|---------|------------------------------|--------------------|
| Co      | 0                            | 0.0563             |
| Ni      | 0                            | 0.0527             |

## References:

1. Y. Pan, W. Hu, D. Liu, Y. Liu and C. Liu, *J. Mater. Chem. A*, 2015, **3**, 13087-13094.
2. J. Chang, S. Li, G. Li, J. Ge, C. Liu and W. Xing, *J. Mater. Chem. A*, 2016, **4**, 9755-9759.
3. X. Wang, Y. V. Kolen'ko, X. Q. Bao, K. Kovnir and L. Liu, *Angew. Chem. Int. Ed. Engl.*, 2015, **54**, 8188-8192.
4. Y. Pan, Y. Liu, J. Zhao, K. Yang, J. Liang, D. Liu, W. Hu, D. Liu, Y. Liu and C. Liu, *J. Mater. Chem. A*, 2015, **3**, 1656-1665.
5. E. J. Popczun, C. G. Read, C. W. Roske, N. S. Lewis and R. E. Schaak, *Angew. Chem. Int. Ed. Engl.*, 2014, **53**, 5427-5430.
6. J. Tian, Q. Liu, A. M. Asiri and X. Sun, *J. Am. Chem. Soc.*, 2014, **136**, 7587-7590.
7. C. Wu, Y. Yang, D. Dong, Y. Zhang and J. Li, *Small*, 2017, **13**.
8. H. Du, Q. Liu, N. Cheng, A. M. Asiri, X. Sun and C. M. Li, *J. Mater. Chem. A*, 2014, **2**, 14812-14816.
9. M. Xu, L. Han, Y. Han, Y. Yu, J. Zhai and S. Dong, *J. Mater. Chem. A*, 2015, **3**, 21471-21477.
10. Y. Bai, H. Zhang, L. Liu, H. Xu and Y. Wang, *Chem.*, 2016, **22**, 1021-1029.
11. Y. Tan, H. Wang, P. Liu, Y. Shen, C. Cheng, A. Hirata, T. Fujita, Z. Tang and M. Chen, *Energy Environ. Sci.*, 2016, **9**, 2257-2261.
12. J. Deng, P. Ren, D. Deng and X. Bao, *Angew. Chem. Int. Ed. Engl.*, 2015, **54**, 2100-2104.
13. X. Wang, H. Zhou, D. Zhang, M. Pi, J. Feng and S. Chen, *J. Power Sources*, 2018, **387**, 1-8.
14. H. Li, X. Zhao, H. Liu, S. Chen, X. Yang, C. Lv, H. Zhang, X. She and D. Yang, *Small*, 2018, **14**, e1802824.
15. H. Lu, W. Fan, Y. Huang and T. Liu, *Nano Res.*, 2018, **11**, 1274-1284.
16. L. Yan, P. Dai, Y. Wang, X. Gu, L. Li, L. Cao and X. Zhao, *ACS Appl. Mater. Int.*, 2017, **9**, 11642-11650.
17. Y. Shi, Y. Xu, S. Zhuo, J. Zhang and B. Zhang, *ACS Appl. Mater. Int.*, 2015, **7**, 2376-2384.
18. M. Chen, J. Qi, W. Zhang and R. Cao, *Chem. Commun.*, 2017, **53**, 5507-5510.
19. X. Zou, X. Huang, A. Goswami, R. Silva, B. R. Sathe, E. Mikmekova and T. Asefa, *Angew. Chem. Int. Ed. Engl.*, 2014, **53**, 4372-4376.
20. T. Liu, L. Xie, J. Yang, R. Kong, G. Du, A. M. Asiri, X. Sun and L. Chen, *ChemElectroChem*, 2017, **4**, 1840-1845.
21. L. A. Stern, L. Feng, F. Song and X. Hu, *Energy Environ. Sci.*, 2015, **8**, 2347-2351.
22. J. Li, M. Yan, X. Zhou, Z. Huang, Z. Xia, C. Chang, Y. Ma and Y. Qu, *Adv. Funct. Mater.*, 2016, **26**, 6785-6796.
23. J. Wang, D. Gao, G. Wang, S. Miao, H. Wu, J. Li and X. Bao, *J. Mater. Chem. A*, 2014, **2**, 20067-20074.
24. G. Chen, T. Y. Ma, Z. Liu, N. Li, Y. Su, K. Davey and S. Qiao, *Adv. Funct. Mater.*, 2016, **26**, 3314-3323.
25. H. Jin, J. Wang, D. Su, Z. Wei, Z. Pang and Y. Wang, *J. Am. Chem. Soc.*, 2015, **137**, 2688-2694.
26. N. Jiang, B. You, M. Sheng and Y. Sun, *Angew. Chem. Int. Ed. Engl.*, 2015, **54**, 6251-6254.

27. C. Wang, J. Jiang, T. Ding, G. Chen, W. Xu and Q. Yang, *Adv. Funct. Mater.*, 2016, **3**, 1500454.
28. L. Jiao, Y. Zhou and H. Jiang, *Chem. Sci.*, 2016, **7**, 1690-1695.
29. X. Yu, Y. Feng, B. Guan, X. (David) Lou and U. Paik, *Energy Environ. Sci.*, 2016, **9**, 1246-1250.
30. J. Landon, E. Demeter, N. İnoğlu, C. Keturakis, I. E. Wachs, R. Vasić, A. I. Frenkel and J. R. Kitchin, *ACS Catal.*, 2012, **2**, 1793-1801.
31. F. Song and X. Hu, *Nat. Commun.*, 2014, **5**, 4477.
32. Y. Yang, H. Fei, G. Ruan, C. Xiang and J. M. Tour, *ACS Nano*, 2014, **8**, 9518-9523.
33. H. Liang, F. Meng, M. Caban-Acevedo, L. Li, A. Forticaux, L. Xiu, Z. Wang and S. Jin, *Nano Lett.*, 2015, **15**, 1421-1427.
